# Supplementary material for: Magnetic structures of the B and C type Cr(PO3)3metaphosphates
Source: Royal Society of Chemistry journal article supplement (doi:10.1039/b313895j), 2004-01-01
Supplement: b313895j.pdf [file b313895j.pdf]

## SUPPLEMENTARY MATERIAL

Fig S1. Observed (crosses), calculated (solid line), and difference (at the bottom) neutron diffraction (D1A, D2B, ILL) profiles of (a)  $\text{Cr}(\text{PO}_3)_3$  and (b)  $\text{Cr}_2\text{P}_6\text{O}_{18}$ , at room temperature. Vertical marks correspond to the position of the allowed reflections for the crystallographic structures.

Table S1. Final refined positional and thermal parameters from neutron diffraction patterns (D1A, D2B) at room temperature for (a)  $\text{Cr}(\text{PO}_3)_3$  and (b)  $\text{Cr}_2\text{P}_6\text{O}_{18}$ .

Table S2. Main interatomic distances ( $\text{\AA}$ ) and angles ( $^\circ$ ) for (a)  $\text{Cr}(\text{PO}_3)_3$  and (b)  $\text{Cr}_2\text{P}_6\text{O}_{18}$  at room temperature.

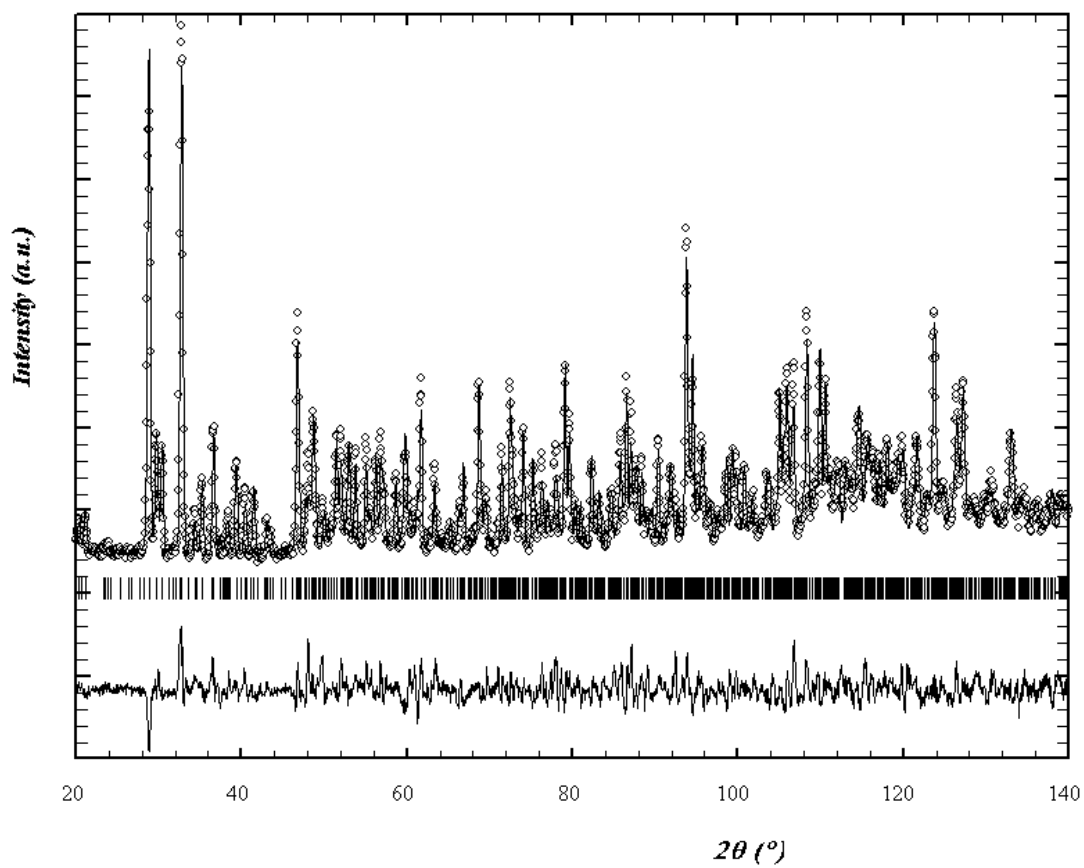

Fig S1(a)

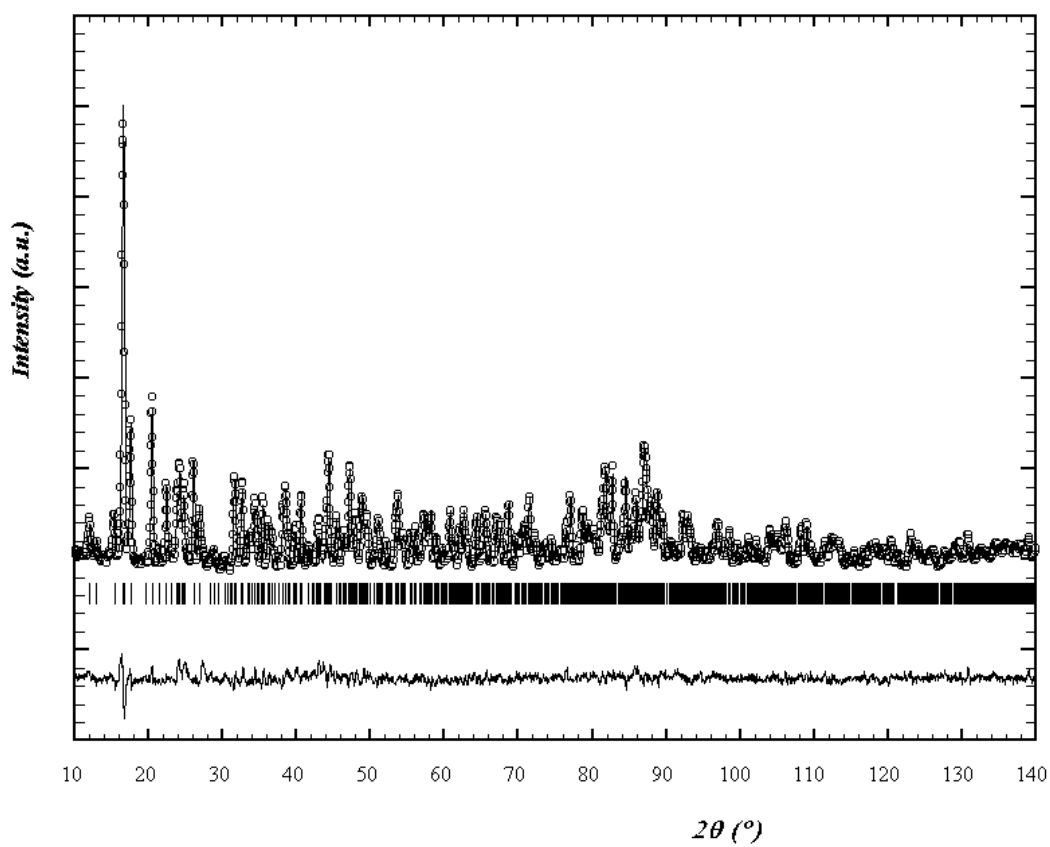

Fig S1(b)

Table S1

| <b>Cr(PO<sub>3</sub>)<sub>3</sub></b> |          |            |           |                         |
|---------------------------------------|----------|------------|-----------|-------------------------|
| <b>Atom</b>                           | <b>x</b> | <b>y</b>   | <b>z</b>  | <b>B(Å<sup>2</sup>)</b> |
| Cr(1)                                 | 0.933(1) | 0.0814(7)  | 0.226(2)  | 0.68(5)                 |
| Cr(2)                                 | 0.909(1) | 0.2455(7)  | -0.307(2) | 0.68(5)                 |
| Cr(3)                                 | 0.442(1) | 0.0841(8)  | -0.279(2) | 0.68(5)                 |
| P(1)                                  | 0.802(1) | -0.0289(8) | -0.102(2) | 0.68(5)                 |
| P(2)                                  | 0.790(1) | 0.3027(8)  | -0.121(2) | 0.68(5)                 |
| P(3)                                  | 0.789(1) | 0.3638(8)  | 0.375(2)  | 0.68(5)                 |
| P(4)                                  | 0.195(1) | 0.0166(8)  | -0.017(2) | 0.68(5)                 |
| P(5)                                  | 0.692(1) | 0.1912(8)  | -0.019(2) | 0.68(5)                 |
| P(6)                                  | 0.577(1) | 0.0285(7)  | -0.457(2) | 0.68(5)                 |
| P(7)                                  | 0.658(1) | 0.1436(8)  | -0.574(2) | 0.68(5)                 |
| P(8)                                  | 0.567(1) | 0.3025(8)  | 0.032(2)  | 0.68(5)                 |
| P(9)                                  | 1.069(1) | 0.1350(8)  | 0.036(2)  | 0.68(5)                 |
| O(1)                                  | 0.740(2) | 0.100(1)   | 0.391(3)  | 0.68(5)                 |
| O(2)                                  | 0.777(2) | 0.138(1)   | 1.107(3)  | 0.68(5)                 |
| O(3)                                  | 0.965(2) | 0.111(1)   | 1.050(3)  | 0.68(5)                 |
| O(4)                                  | 0.766(2) | 0.177(1)   | 0.588(3)  | 0.68(5)                 |
| O(5)                                  | 0.403(2) | 0.207(1)   | 0.374(3)  | 0.68(5)                 |
| O(6)                                  | 0.493(2) | 0.023(1)   | 0.601(3)  | 0.68(5)                 |
| O(7)                                  | 0.632(2) | 0.101(1)   | 0.546(3)  | 0.68(5)                 |
| O(8)                                  | 0.927(2) | 0.049(1)   | 0.428(2)  | 0.68(5)                 |
| O(9)                                  | 0.547(2) | 0.186(1)   | 0.270(3)  | 0.68(5)                 |
| O(10)                                 | 0.785(2) | 0.230(1)   | 0.954(3)  | 0.68(5)                 |
| O(11)                                 | 0.404(2) | 0.130(1)   | 0.875(3)  | 0.68(5)                 |
| O(12)                                 | 0.303(2) | 0.020(1)   | 0.654(3)  | 0.68(5)                 |
| O(13)                                 | 0.705(2) | 0.019(1)   | 0.741(2)  | 0.68(5)                 |
| O(14)                                 | 0.574(2) | 0.158(1)   | 0.818(3)  | 0.68(5)                 |
| O(15)                                 | 0.662(2) | 0.240(1)   | 1.084(3)  | 0.68(5)                 |
| O(16)                                 | 0.155(2) | 0.146(1)   | 0.691(2)  | 0.68(5)                 |
| O(17)                                 | 0.154(2) | 0.188(1)   | 0.192(2)  | 0.68(5)                 |
| O(18)                                 | 0.309(2) | 0.138(1)   | 0.499(2)  | 0.68(5)                 |
| O(19)                                 | 0.568(2) | 0.046(1)   | 0.976(2)  | 0.68(5)                 |
| O(20)                                 | 0.959(2) | 0.211(1)   | 0.542(3)  | 0.68(5)                 |
| O(21)                                 | 0.837(3) | -0.001(1)  | 1.077(3)  | 0.68(5)                 |
| O(22)                                 | 1.021(2) | 0.171(1)   | 0.348(2)  | 0.68(5)                 |
| O(23)                                 | 1.035(2) | 0.181(1)   | 0.882(2)  | 0.68(5)                 |
| O(24)                                 | 0.309(2) | 0.181(1)   | 1.019(2)  | 0.68(5)                 |
| O(25)                                 | 0.280(2) | 0.065(1)   | 0.956(3)  | 0.68(5)                 |
| O(26)                                 | 0.155(2) | 0.071(1)   | 1.067(3)  | 0.68(5)                 |
| O(27)                                 | 0.087(2) | 0.024(1)   | 0.325(3)  | 0.68(5)                 |

| <b>Cr<sub>2</sub>P<sub>6</sub>O<sub>18</sub></b> |            |            |          |                         |
|--------------------------------------------------|------------|------------|----------|-------------------------|
| <b>Atom</b>                                      | <b>x</b>   | <b>y</b>   | <b>z</b> | <b>B(Å<sup>2</sup>)</b> |
| Cr                                               | 0.381(1)   | 0.1378(7)  | 0.118(2) | 0.73(7)                 |
| P(1)                                             | 0.0143(9)  | 0.1616(5)  | 0.209(1) | 0.73(7)                 |
| P(2)                                             | 0.2909(9)  | 0.1128(5)  | 0.585(1) | 0.73(7)                 |
| P(3)                                             | 0.2783(9)  | -0.0445(4) | 0.853(1) | 0.73(7)                 |
| O(1)                                             | 0.1101(9)  | 0.1500(4)  | 0.462(1) | 0.99(4)                 |
| O(2)                                             | -0.0949(8) | 0.0764(4)  | 0.161(1) | 0.99(4)                 |
| O(3)                                             | 0.2485(9)  | 0.0123(4)  | 0.632(1) | 0.99(4)                 |
| O(4)                                             | -0.0928(9) | 0.2402(4)  | 0.182(1) | 0.99(4)                 |
| O(5)                                             | 0.1342(8)  | 0.1546(4)  | 0.068(1) | 0.99(4)                 |
| O(6)                                             | 0.3530(8)  | 0.1617(5)  | 0.800(1) | 0.99(4)                 |
| O(7)                                             | 0.4009(8)  | 0.1142(4)  | 0.424(1) | 0.99(4)                 |
| O(8)                                             | 0.3410(8)  | 0.0110(4)  | 0.058(1) | 0.99(4)                 |
| O(9)                                             | 0.3852(8)  | -0.1230(4) | 0.826(1) | 0.99(4)                 |

Table S2(a)

| <b>Cr(PO<sub>3</sub>)<sub>3</sub></b> |          |                   |          |                   |          |
|---------------------------------------|----------|-------------------|----------|-------------------|----------|
| <b>Bond Distances Cr-O (Å)</b>        |          |                   |          |                   |          |
| Cr(1)-(O2)                            | 1.95(3)  | Cr(2)-(O4)        | 1.98(3)  | Cr(3)-(O6)        | 1.97(3)  |
| Cr(1)-(O3)                            | 2.00(3)  | Cr(2)-(O5)        | 1.96(3)  | Cr(3)-(O11)       | 1.98(3)  |
| Cr(1)-(O8)                            | 2.02(3)  | Cr(2)-(O9)        | 1.97(3)  | Cr(3)-(O12)       | 1.95(3)  |
| Cr(1)-(O21)                           | 1.95(2)  | Cr(2)-(O20)       | 1.97(3)  | Cr(3)-(O14)       | 1.96(3)  |
| Cr(1)-(O22)                           | 1.98(2)  | Cr(2)-(O23)       | 1.95(3)  | Cr(3)-(O18)       | 2.00(2)  |
| Cr(1)-(O27)                           | 1.96(3)  | Cr(2)-(O24)       | 1.92(2)  | Cr(3)-(O19)       | 2.04(2)  |
| <b>Bond Angles O-Cr-O (°)</b>         |          |                   |          |                   |          |
| O(2)-Cr(1)-(O3)                       | 92.1(3)  | O(4)-Cr(2)-(O5)   | 102.1(2) | O(6)-Cr(3)-(O11)  | 168.5(2) |
| O(2)-Cr(1)-(O8)                       | 94.9(2)  | O(4)-Cr(2)-(O9)   | 173.5(2) | O(6)-Cr(3)-(O12)  | 91.0(2)  |
| O(2)-Cr(1)-(O21)                      | 91.6(2)  | O(4)-Cr(2)-(O20)  | 92.7(2)  | O(6)-Cr(3)-(O14)  | 99.4(2)  |
| O(2)-Cr(1)-(O22)                      | 84.5(2)  | O(4)-Cr(2)-(O23)  | 93.8(2)  | O(6)-Cr(3)-(O18)  | 95.5(2)  |
| O(2)-Cr(1)-(O27)                      | 174.7(2) | O(4)-Cr(2)-(O24)  | 95.5(2)  | O(6)-Cr(3)-(O19)  | 98.2(2)  |
| O(3)-Cr(1)-(O8)                       | 172.2(2) | O(5)-Cr(2)-(O9)   | 83.4(2)  | O(11)-Cr(3)-(O12) | 84.6(2)  |
| O(3)-Cr(1)-(O21)                      | 89.9(2)  | O(5)-Cr(2)-(O20)  | 165.0(2) | O(11)-Cr(3)-(O14) | 85.1(2)  |
| O(3)-Cr(1)-(O22)                      | 84.2(2)  | O(5)-Cr(2)-(O23)  | 87.3(2)  | O(11)-Cr(3)-(O18) | 94.7(2)  |
| O(3)-Cr(1)-(O27)                      | 83.1(2)  | O(5)-Cr(2)-(O24)  | 92.1(2)  | O(11)-Cr(3)-(O19) | 71.7(2)  |
| O(8)-Cr(1)-(O21)                      | 93.2(2)  | O(9)-Cr(2)-(O20)  | 81.9(2)  | O(12)-Cr(3)-(O14) | 169.6(2) |
| O(8)-Cr(1)-(O22)                      | 93.2(2)  | O(9)-Cr(2)-(O23)  | 89.8(2)  | O(12)-Cr(3)-(O18) | 85.3(2)  |
| O(8)-Cr(1)-(O27)                      | 89.9(2)  | O(9)-Cr(2)-(O24)  | 80.8(2)  | O(12)-Cr(3)-(O19) | 95.3(2)  |
| O(21)-Cr(1)-(O22)                     | 172.8(2) | O(20)-Cr(2)-(O23) | 89.3(2)  | O(14)-Cr(3)-(O18) | 94.4(2)  |
| O(21)-Cr(1)-(O27)                     | 86.1(2)  | O(20)-Cr(2)-(O24) | 88.9(2)  | O(14)-Cr(3)-(O19) | 82.6(2)  |
| O(22)-Cr(1)-(O27)                     | 97.3(2)  | O(23)-Cr(2)-(O24) | 107.6(2) | O(18)-Cr(3)-(O19) | 166.3(2) |
| <b>Bond Distances P-O (Å)</b>         |          |                   |          |                   |          |
| P(1)-O(1)                             | 1.55(3)  | P(2)-O(5)         | 1.50(3)  | P(3)-O(11)        | 1.51(3)  |
| P(1)-O(8)                             | 1.52(3)  | P(2)-O(10)        | 1.57(2)  | P(3)-O(16)        | 1.55(3)  |
| P(1)-O(13)                            | 1.53(3)  | P(2)-O(17)        | 1.58(3)  | P(3)-O(24)        | 1.47(3)  |
| P(1)-O(21)                            | 1.55(3)  | P(2)-O(18)        | 1.50(2)  | P(3)-O(25)        | 1.58(3)  |
| P(4)-O(12)                            | 1.51(2)  | P(5)-O(2)         | 1.43(3)  | P(6)-O(6)         | 1.49(3)  |
| P(4)-O(25)                            | 1.57(3)  | P(5)-O(10)        | 1.56(3)  | P(6)-O(7)         | 1.55(3)  |
| P(4)-O(26)                            | 1.57(3)  | P(5)-O(14)        | 1.53(3)  | P(6)-O(13)        | 1.59(3)  |
| P(4)-O(27)                            | 1.50(3)  | P(5)-O(15)        | 1.53(2)  | P(6)-O(19)        | 1.51(2)  |
| P(7)-O(1)                             | 1.53(4)  | P(8)-O(15)        | 1.57(3)  | P(9)-O(3)         | 1.51(4)  |
| P(7)-O(4)                             | 1.45(3)  | P(8)-O(16)        | 1.55(2)  | P(9)-O(17)        | 1.55(2)  |
| P(7)-O(7)                             | 1.57(3)  | P(8)-O(20)        | 1.49(4)  | P(9)-O(23)        | 1.50(3)  |
| P(7)-O(9)                             | 1.52(3)  | P(8)-O(22)        | 1.52(2)  | P(9)-O(26)        | 1.55(3)  |
| <b>Bond Angles O-P-O (°)</b>          |          |                   |          |                   |          |
| O(1)-P(1)-O(8)                        | 105.2(3) | O(5)-P(2)-O(10)   | 102.5(3) | O(11)-P(3)-O(16)  | 117.7(3) |
| O(1)-P(1)-O(13)                       | 111.2(2) | O(5)-P(2)-O(17)   | 116.5(3) | O(11)-P(3)-O(24)  | 114.3(3) |
| O(1)-P(1)-O(21)                       | 98.3(2)  | O(5)-P(2)-O(18)   | 113.2(3) | O(11)-P(3)-O(25)  | 106.7(3) |
| O(8)-P(1)-O(13)                       | 120.5(3) | O(10)-P(2)-O(17)  | 105.5(2) | O(16)-P(3)-O(24)  | 113.9(2) |
| O(8)-P(1)-O(21)                       | 107.8(3) | O(10)-P(2)-O(18)  | 111.0(2) | O(16)-P(3)-O(25)  | 106.1(2) |
| O(13)-P(1)-O(21)                      | 111.4(2) | O(17)-P(2)-O(18)  | 107.8(2) | O(24)-P(3)-O(25)  | 94.5(2)  |
| O(12)-P(4)-O(25)                      | 98.3(2)  | O(2)-P(5)-O(10)   | 99.6(2)  | O(6)-P(6)-O(7)    | 119.4(3) |
| O(12)-P(4)-O(26)                      | 98.8(3)  | O(2)-P(5)-O(14)   | 110.7(3) | O(6)-P(6)-O(13)   | 93.4(3)  |
| O(12)-P(4)-O(27)                      | 121.7(2) | O(2)-P(5)-O(15)   | 105.9(3) | O(6)-P(6)-O(19)   | 101.7(3) |
| O(25)-P(4)-O(26)                      | 99.7(3)  | O(10)-P(5)-O(14)  | 114.6(3) | O(7)-P(6)-O(13)   | 85.6(2)  |
| O(25)-P(4)-O(27)                      | 118.4(3) | O(10)-P(5)-O(15)  | 109.5(3) | O(7)-P(6)-O(19)   | 138.5(2) |
| O(26)-P(4)-O(27)                      | 115.8(2) | O(14)-P(5)-O(15)  | 115.0(2) | O(13)-P(6)-O(19)  | 97.9(2)  |
| O(1)-P(7)-O(4)                        | 95.6(2)  | O(15)-P(8)-O(16)  | 100.4(2) | O(3)-P(9)-O(17)   | 106.7(3) |
| O(1)-P(7)-O(7)                        | 110.7(3) | O(15)-P(8)-O(20)  | 116.7(3) | O(3)-P(9)-O(23)   | 119.7(3) |
| O(1)-P(7)-O(9)                        | 117.3(3) | O(15)-P(8)-O(22)  | 107.3(2) | O(3)-P(9)-O(26)   | 109.7(3) |
| O(4)-P(7)-O(7)                        | 88.5(2)  | O(16)-P(8)-O(20)  | 103.7(3) | O(17)-P(9)-O(23)  | 98.7(2)  |
| O(4)-P(7)-O(9)                        | 122.3(2) | O(16)-P(8)-O(22)  | 115.4(2) | O(17)-P(9)-O(26)  | 106.9(2) |
| O(7)-P(7)-O(9)                        | 117.4(2) | O(20)-P(8)-O(22)  | 112.8(3) | O(23)-P(9)-O(26)  | 113.6(2) |

Table S2(b)

| <b>Cr<sub>2</sub>P<sub>6</sub>O<sub>18</sub></b>     |          |                |          |                |          |
|------------------------------------------------------|----------|----------------|----------|----------------|----------|
| <b>Bond Distances Cr-O (Å) and Angles O-Cr-O (°)</b> |          |                |          |                |          |
| Cr-(O4)                                              | 1.89(1)  | O(4)-Cr-(O5)   | 87.6(6)  | O(5)-Cr-(O9)   | 178.4(7) |
| Cr-(O5)                                              | 2.00(1)  | O(4)-Cr-(O6)   | 90.2(6)  | O(6)-Cr-(O7)   | 177.9(7) |
| Cr-(O6)                                              | 1.95(1)  | O(4)-Cr-(O7)   | 90.1(6)  | O(6)-Cr-(O8)   | 91.3(6)  |
| Cr-(O7)                                              | 1.88(1)  | O(4)-Cr-(O8)   | 176.1(7) | O(6)-Cr-(O9)   | 92.4(6)  |
| Cr-(O8)                                              | 1.97(1)  | O(4)-Cr-(O9)   | 91.5(6)  | O(7)-Cr-(O8)   | 88.1(6)  |
| Cr-(O9)                                              | 1.88(1)  | O(5)-Cr-(O6)   | 88.9(6)  | O(7)-Cr-(O9)   | 89.5(6)  |
|                                                      |          | O(5)-Cr-(O7)   | 89.0(6)  | O(8)-Cr-(O9)   | 91.8(6)  |
|                                                      |          | O(5)-Cr-(O8)   | 88.8(6)  |                |          |
| <b>Bond Distances P-O (Å)</b>                        |          |                |          |                |          |
| P(1)-O(1)                                            | 1.559(9) | P(2)-O(1)      | 1.59(1)  | P(3)-O(2)      | 1.57(1)  |
| P(1)-O(2)                                            | 1.560(9) | P(2)-O(3)      | 1.60(1)  | P(3)-O(3)      | 1.581(9) |
| P(1)-O(4)                                            | 1.46(1)  | P(2)-O(6)      | 1.486(9) | P(3)-O(8)      | 1.494(9) |
| P(1)-O(5)                                            | 1.49(1)  | P(2)-O(7)      | 1.52(1)  | P(3)-O(9)      | 1.522(9) |
| <b>Bond Angles O-P-O (°)</b>                         |          |                |          |                |          |
| O(1)-P(1)-O(2)                                       | 102.1(7) | O(1)-P(2)-O(3) | 101.5(7) | O(2)-P(3)-O(3) | 101.3(7) |
| O(1)-P(1)-O(4)                                       | 109.4(7) | O(1)-P(2)-O(6) | 107.7(7) | O(2)-P(3)-O(8) | 109.3(7) |
| O(1)-P(1)-O(5)                                       | 109.8(7) | O(1)-P(2)-O(7) | 109.3(8) | O(2)-P(3)-O(9) | 109.5(7) |
| O(2)-P(1)-O(4)                                       | 110.4(7) | O(3)-P(2)-O(6) | 110.6(7) | O(3)-P(3)-O(8) | 111.3(7) |
| O(2)-P(1)-O(5)                                       | 105.8(7) | O(3)-P(2)-O(7) | 109.2(7) | O(3)-P(3)-O(9) | 106.8(7) |
| O(4)-P(1)-O(5)                                       | 117.8(8) | O(6)-P(2)-O(7) | 117.1(8) | O(8)-P(3)-O(9) | 117.2(7) |
